# Supplementary material
Source: PubMed Central journal article supplement (PMC3221837)
Supplement: NIHMS330259-supplement-1.pdf [file NIHMS330259-supplement-1.pdf]

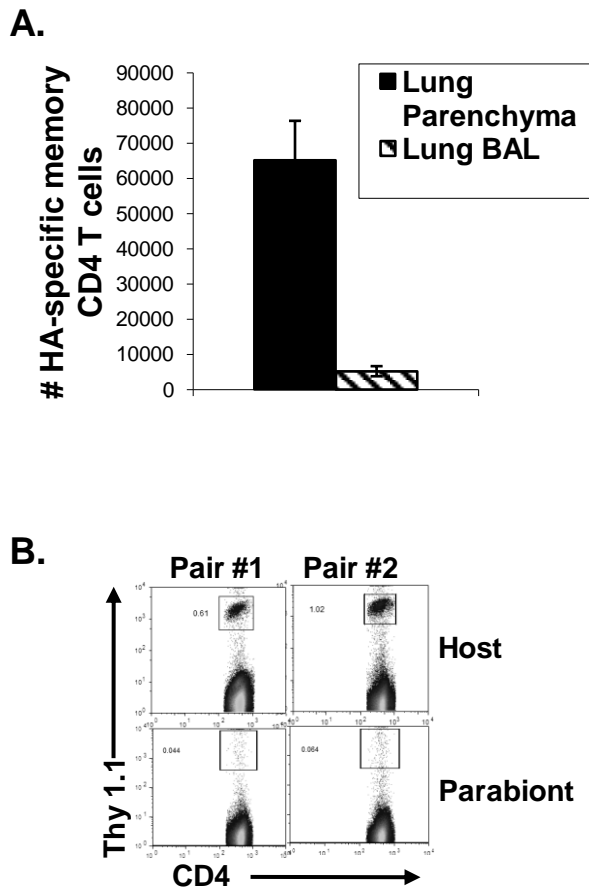

**Supplementary Figure 1: (A)** HA-specific lung memory CD4 T cells (Thy1.1+) were isolated from RAG2<sup>-/-</sup> adoptive hosts and transferred intravenously into BALB/c congenic hosts as in Fig. 2A. HA-specific memory CD4 T cells were isolated from Bronchiolar lavage fluid and lung digests 7 days after transfer, and the frequency of HA-specific cells was determined by flow cytometry and used to calculate the absolute number of HA-specific memory T cells in each compartment. **(B)** Long-term Retention of Lung-derived memory CD4 T cells. Parabiosis pairs were set up as in Fig. 2 and tissues were harvested after 21 days conjoined, and plots show the lungs of host and parabiont partner mice. HA-specific memory CD4 T cells were only detected in the lungs of host mice and not in other tissues of host or parabiont partner mice.
